# Supplementary figures and images for: Establishment of a Hydrometallurgical Scheme for the Recovery of Copper, Nickel, and Cobalt from Smelter Slag and Its Economic Evaluation
Source: MDPI journal article supplement (doi:10.3390/su151310496), 2023-07-03

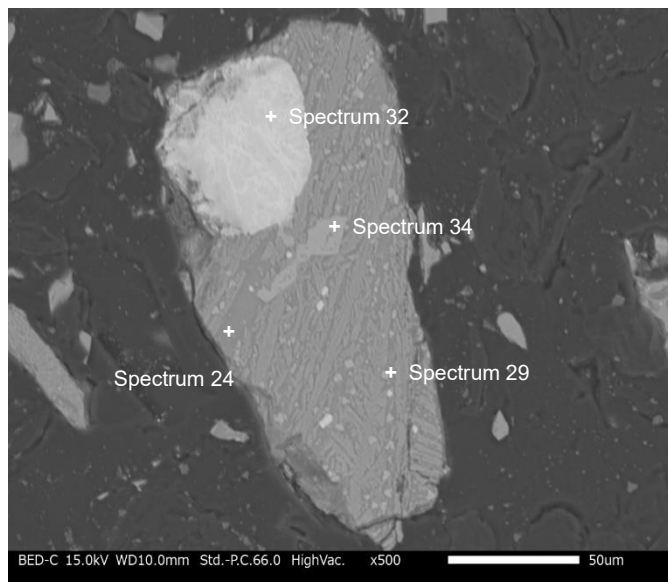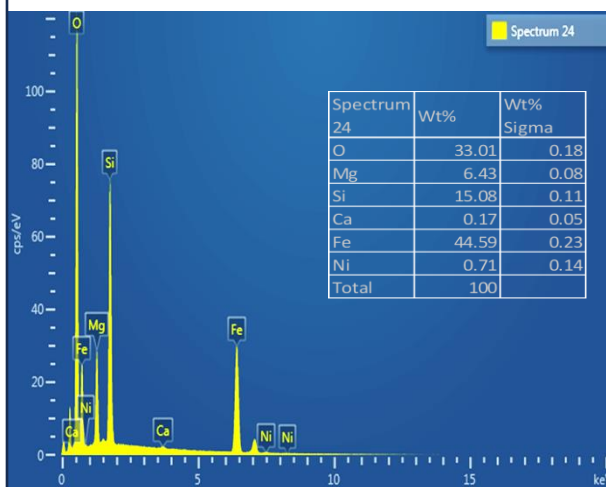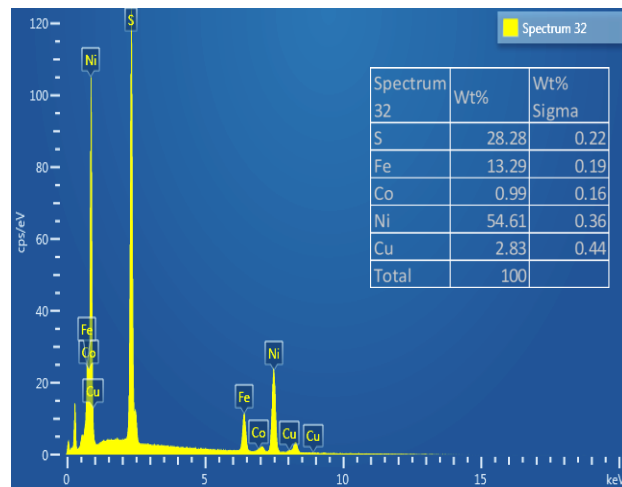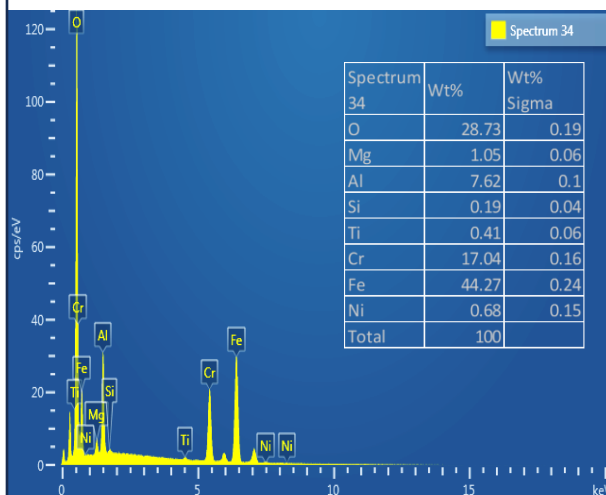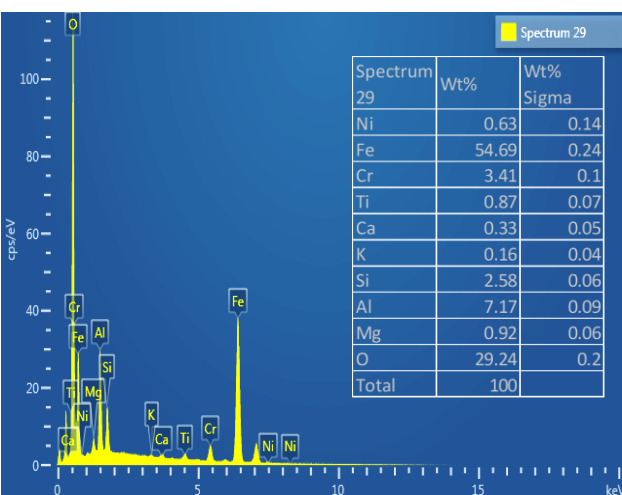

Figure S1: EDX spectrum analysis of different locations in the slag particle.

Supplement: s1 [file s1]
